# Supplementary material
Source: Springer Nature journal article supplement (https://www.springermedizin.de/resource/supplementary/13018_2009_167_MOESM5_ESM.pdf/9636456)

### MESS < 7

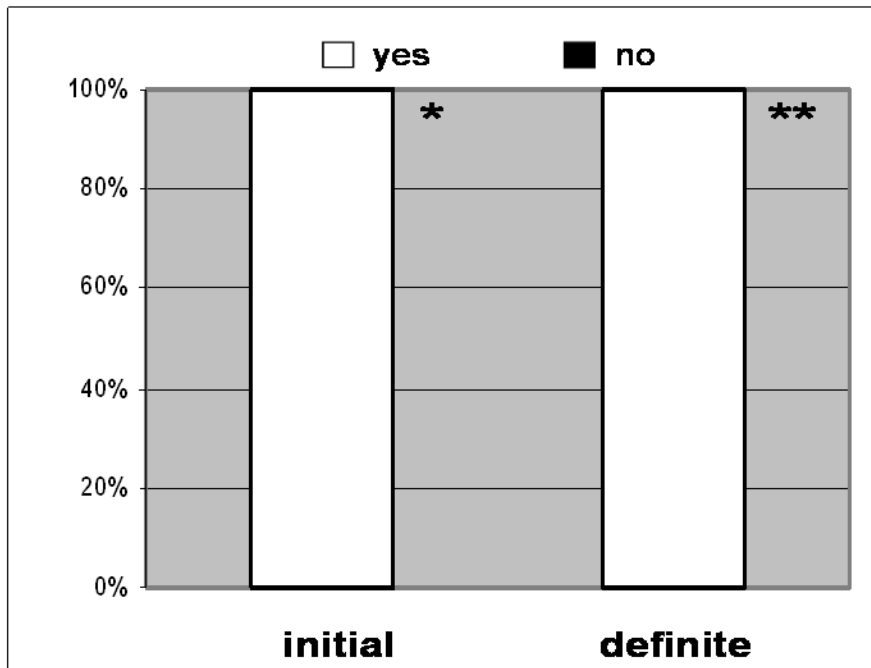

### MESS ≥ 7

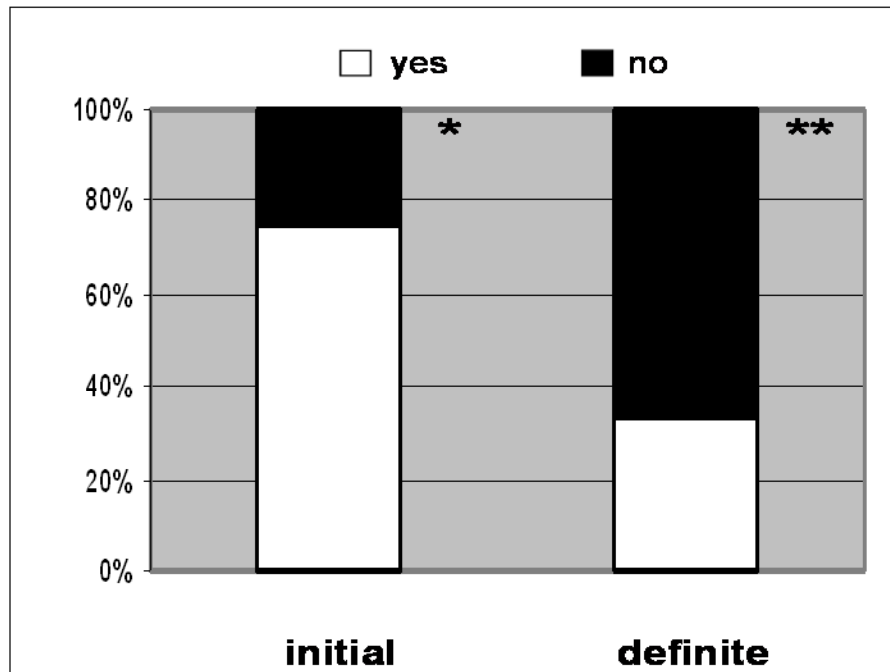

statistical significance (\*p < 0.05 ; \*\*p < 0.001) MESS-Score and limb salvage

Supplement: MOESM5 [file 9636456]
